# Supplementary material for: Studies on electronic energy transfer (EET) on a series of room temperature ionic liquids (RTILs): can the EET studies on RTILs be exploited to predict their structural organization?
Source: Royal Society of Chemistry journal article supplement (doi:10.1039/c4ra05582a), 2014-08-20
Supplement: c4ra05582a1.pdf [file c4ra05582a1.pdf]

### Supplementary information for

## Studies on Electronic Energy Transfer (EET) on a Series of Room Temperature Ionic Liquids (RTILs): Can the EET Studies on RTILs be exploited to predict their Structural Organizations?

Sudhir Kumar Das, Prabhat Kumar Sahu and Moloy Sarkar\*

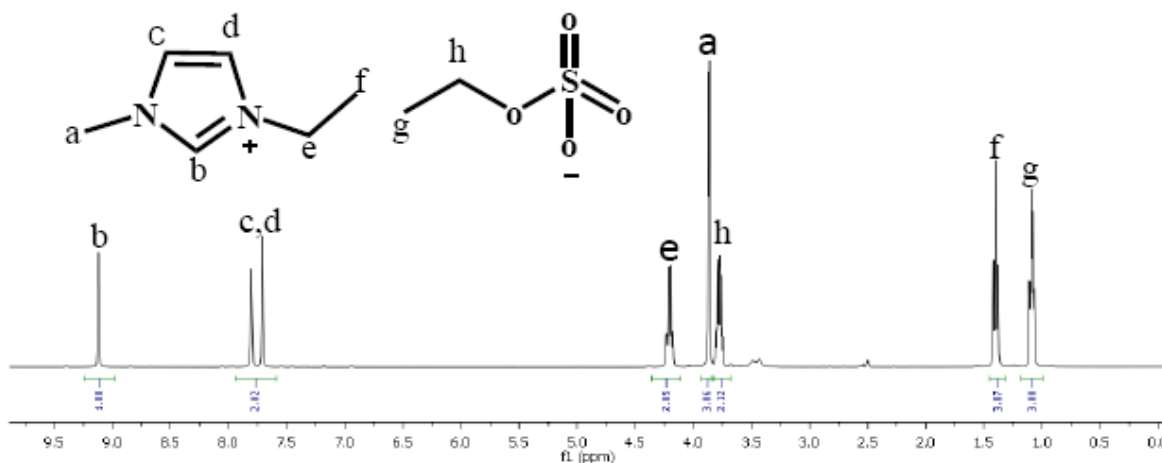

Fig. S1 <sup>1</sup>H NMR spectrum of EMIMESU in DMSO-*d*<sub>6</sub>.

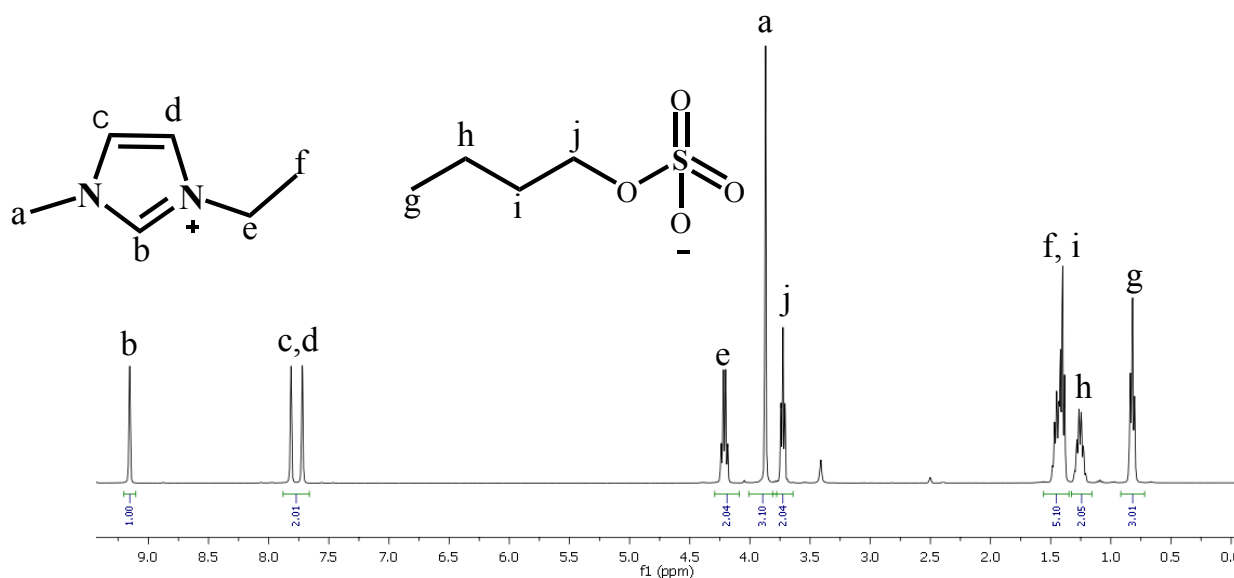

Fig. S2 <sup>1</sup>H NMR spectrum of EMIMBSU in DMSO-*d*<sub>6</sub>.

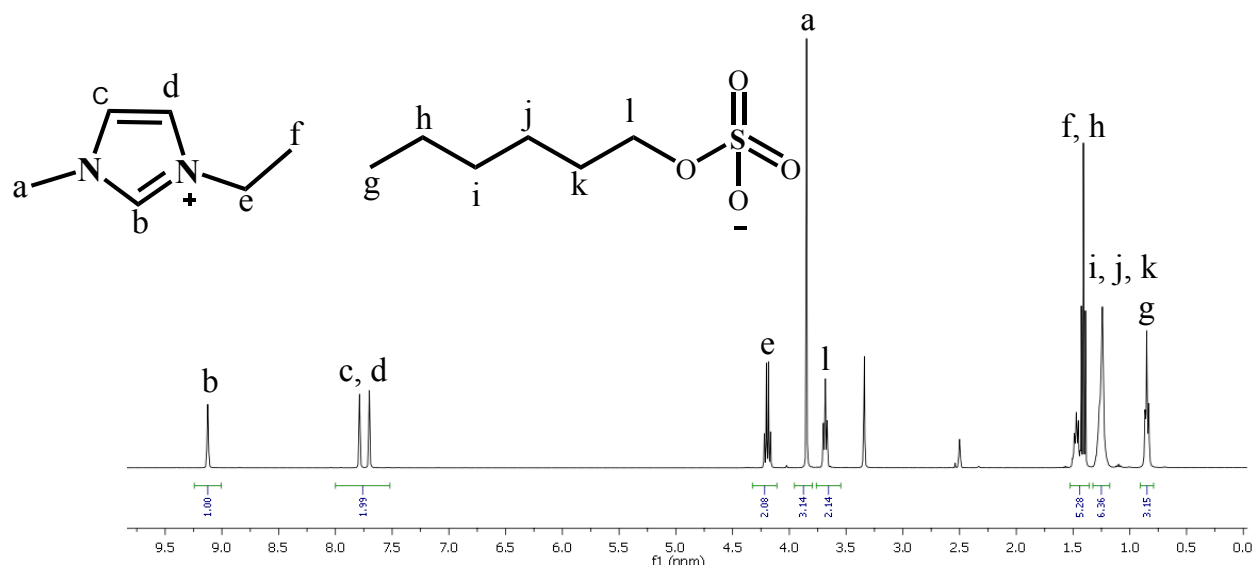

**Fig. S3** <sup>1</sup>H NMR spectrum of EMIMHSU in DMSO-*d*<sub>6</sub>.

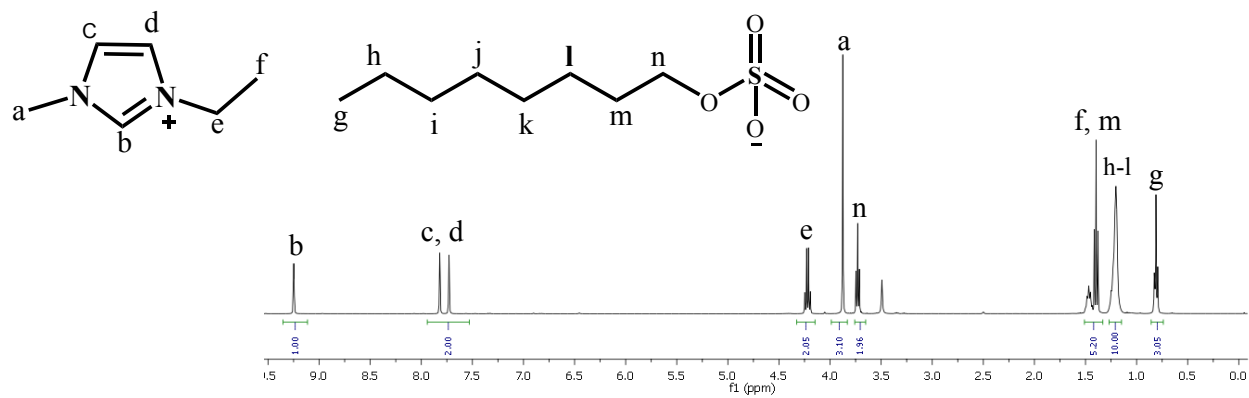

**Fig. S4** <sup>1</sup>H NMR spectrum of EMIMOSU in DMSO-*d*<sub>6</sub>.

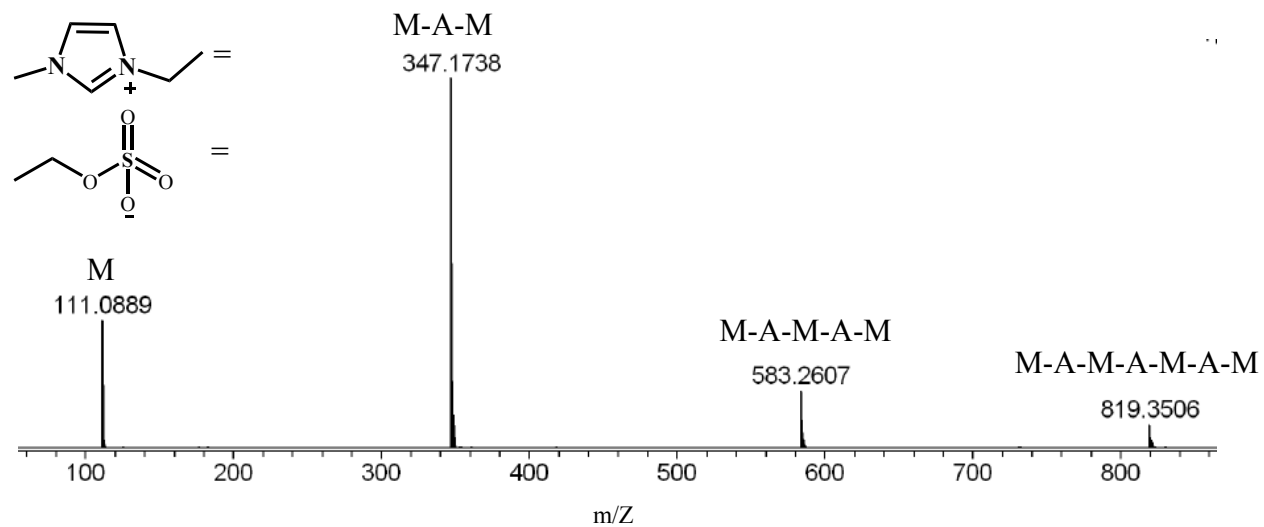

**Fig. S5** High resolution mass spectrum of EMIMESU.

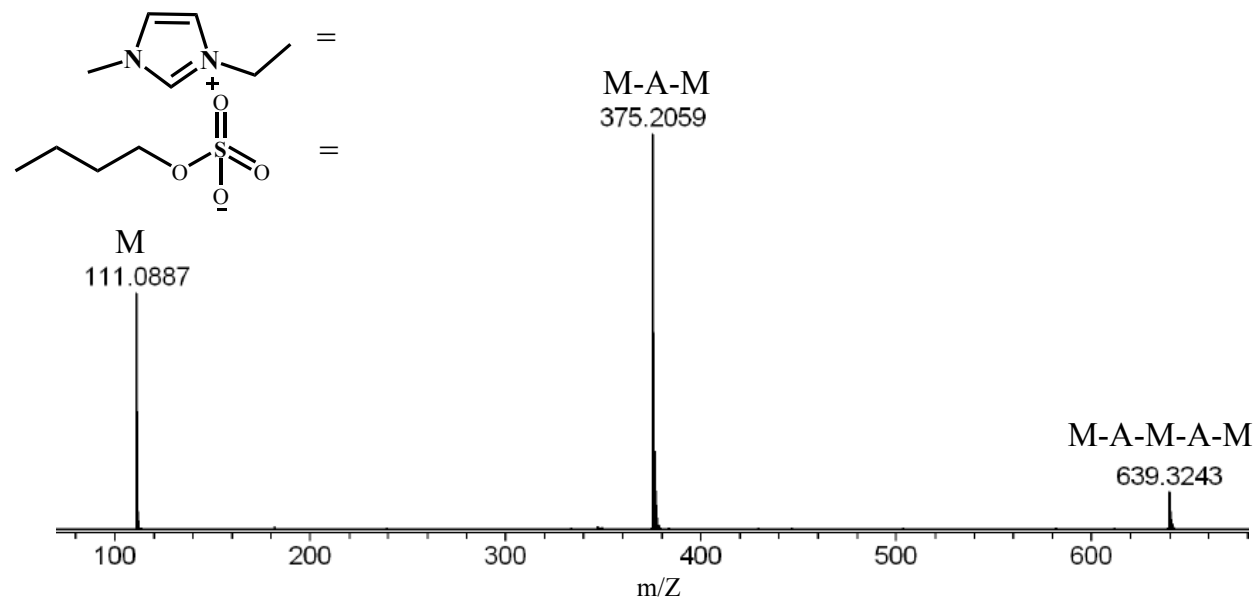

**Fig. S6** High resolution mass spectrum of EMIMBSU.

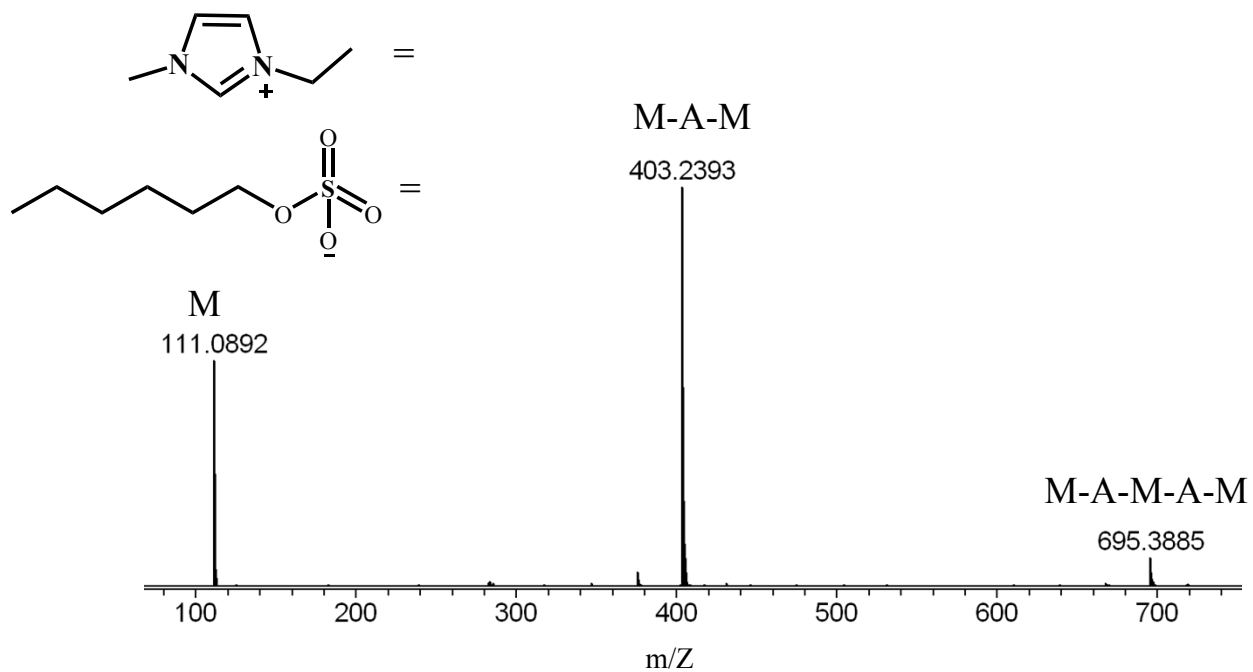

**Fig. S7** High resolution mass spectrum of EMIMHSU.

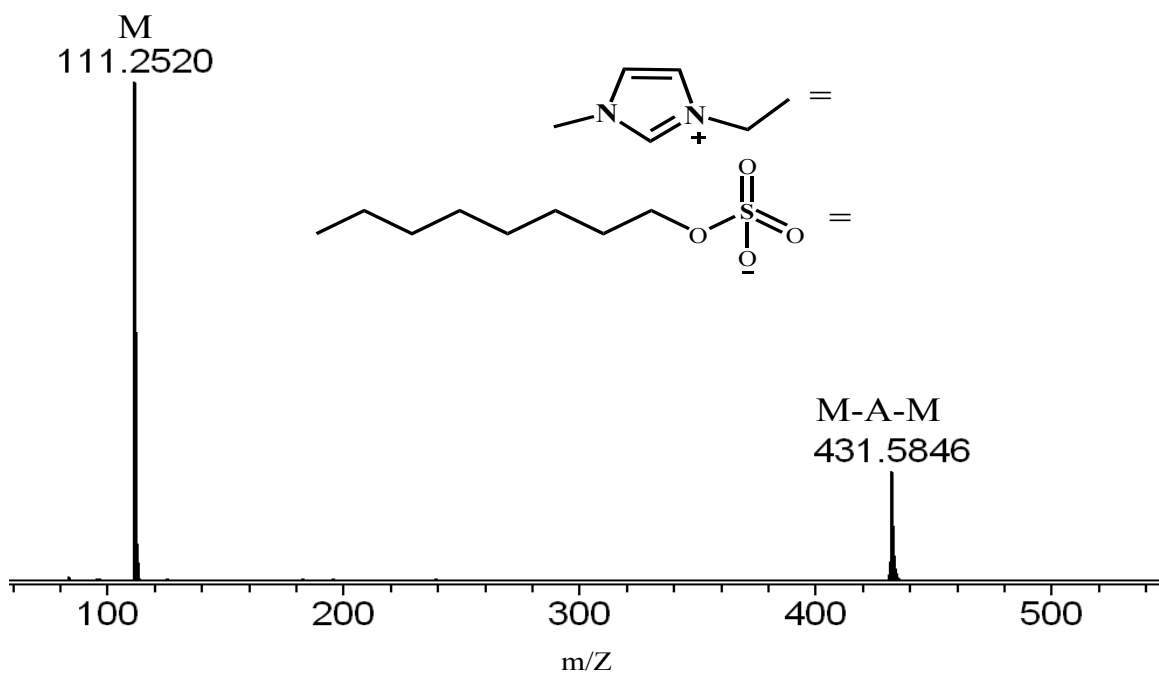

**Fig. S7** High resolution mass spectrum of EMIMOSU.

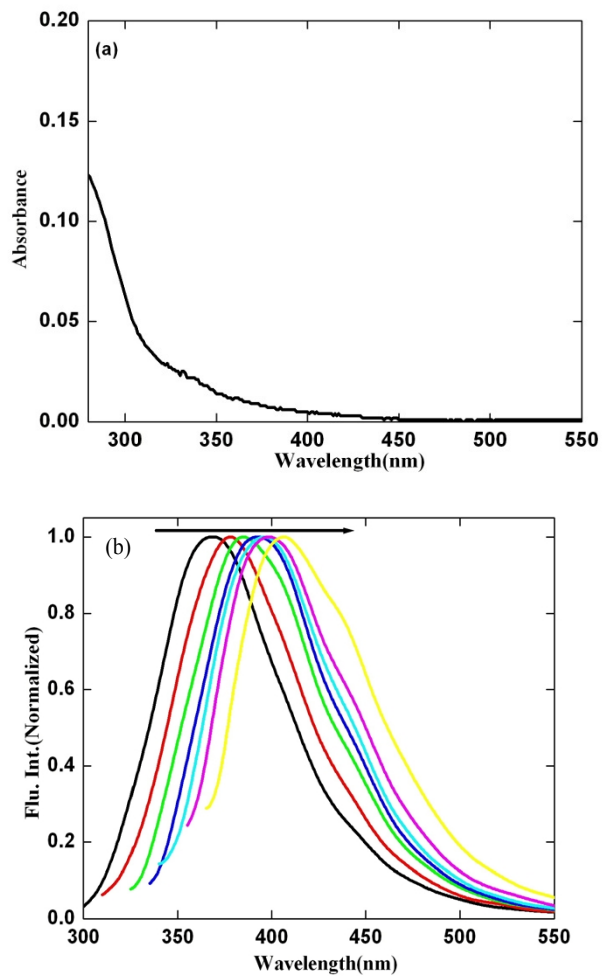

**Fig. S8** (a) Absorption and (b) excitation wavelength dependence emission spectra of neat glycerol from 280-340 nm.

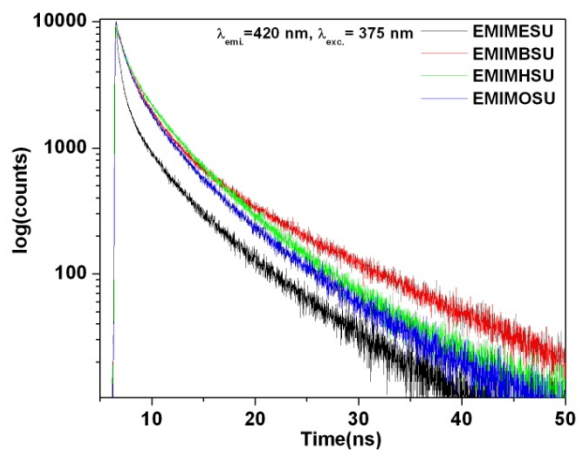

**Fig. S9** Comparison of time resolved fluorescence decay profiles of 1-ethyl-3-methylimidazolium alkylsulfate ionic liquids. Neat ILs was excited 375 nm wavelength and emissions were monitored at 420 nm wavelength respectively.

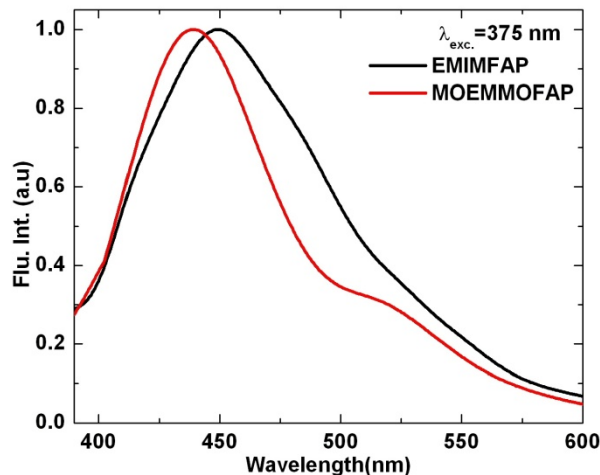

**Fig. S10** Emission spectra of pure MOEMMOFAP and EMIMFAP ILs at the excitation wavelength 375 nm.

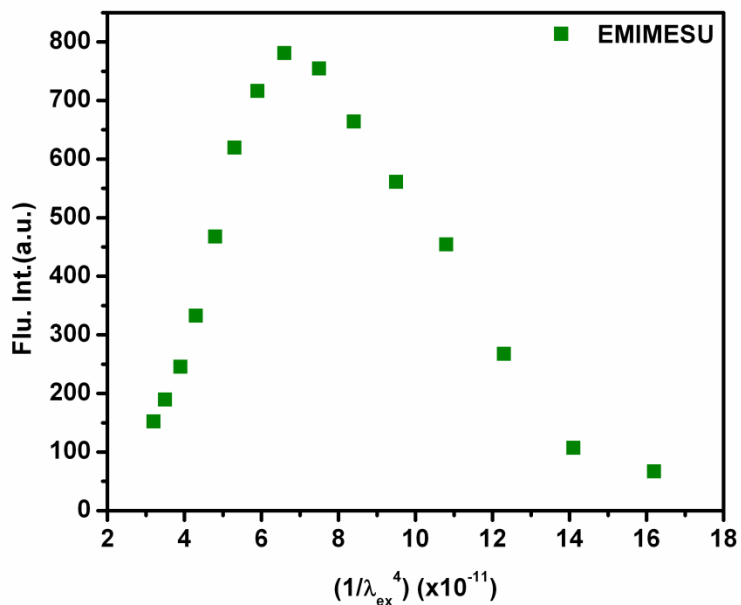

**Fig. S11** Plot of fluorescence intensity vs  $\lambda^{-4}$  of neat EMIMESU.  $\lambda$  = excitation wavelengths.

**Excitation energies and oscillator strengths of Emidazolium (EMIM) cation in gas phase at b3lyp/6-31+G(d,p) level:**

Excited State 1: Singlet-A 5.1581 eV 240.37 nm f=0.0646 <S\*\*2>=0.000

30 -> 31 0.69518

Excited State 2: Singlet-A 5.9628 eV 207.93 nm f=0.0638 <S\*\*2>=0.000

29 -> 31 0.66793

30 -> 32 0.20719

Excited State 3: Singlet-A 6.9951 eV 177.24 nm f=0.1445 <S\*\*2>=0.000

24 -> 31 -0.13050

27 -> 31 0.10448

28 -> 31 -0.17203

29 -> 31 -0.16961

29 -> 32 -0.18671

30 -> 32 0.59265

Excited State 4: Singlet-A 7.1386 eV 173.68 nm f=0.0096 <S\*\*2>=0.000

27 -> 31 0.10823

28 -> 31 0.66166

29 -> 32 -0.15970

30 -> 32 0.10741

Excited State 5: Singlet-A 7.3600 eV 168.46 nm f=0.0195 <S\*\*2>=0.000

27 -> 31 0.66104

29 -> 32 0.20110

Excited State 6: Singlet-A 7.4363 eV 166.73 nm f=0.1010 <S\*\*2>=0.000

25 -> 31 -0.18104

27 -> 31 -0.15466

28 -> 31 0.15513

29 -> 32 0.57223

30 -> 32 0.19903

30 -> 33 0.13338

Excited State 7: Singlet-A 7.6008 eV 163.12 nm f=0.0212 <S\*\*2>=0.000

29 -> 32 -0.11093

30 -> 33 0.66854

30 -> 34 0.11606

#### Fluorescence energies of emidazolium (EMIM) cation.:

Excited State 1: Singlet-A 0.2846 eV 4356.82 nm

Excited State 2: Singlet-A 2.8945 eV 428.34 nm

Excited State 3: Singlet-A 4.3179 eV 287.14 nm

Excited State 4: Singlet-A 4.5670 eV 271.48 nm

Excited State 5: Singlet-A 4.7188 eV 262.74 nm



Excited State 6: Singlet-A 4.9153 eV 252.24 nm

Excited State 7: Singlet-A 5.4598 eV 227.09 nm
